# Supplementary material for: Construction of an integrated database for hERG blocking small molecules
Source: PLoS One. 2018 Jul 6;13(7):e0199348. doi: 10.1371/journal.pone.0199348 (PMC6034787; doi:10.1371/journal.pone.0199348)
Supplement: S1 Table — (XLS) [file pone.0199348.s001.xls]

## Sheet: 552C
Data_source	data	N	N_MurckoAssemblies	Molecular_Weight_Mean	Molecular_Weight_StdDev	ALogP_Mean	ALogP_StdDev	logD_Mean	logD_StdDev	Num_H_Acceptors_Mean	Num_H_Acceptors_StdDev	Num_H_Donors_Mean	Num_H_Donors_StdDev	Num_PositiveAtoms_Mean	Num_PositiveAtoms_StdDev	Num_NegativeAtoms_Mean	Num_NegativeAtoms_StdDev	Molecular_SurfaceArea_Mean	Molecular_SurfaceArea_StdDev	Molecular_PolarSurfaceArea_Mean	Molecular_PolarSurfaceArea_StdDev	Num_RotatableBonds_Mean	Num_RotatableBonds_StdDev	pka_base_Mean	pka_base_StdDev	pka_acid_Mean	pka_acid_StdDev
ChEMBL	positive	4793	2474	438.687	83.6157	4.04423	1.41174	3.3548	1.56937	4.58857	1.79078	1.13645	1.0314	0.737325	0.606022	0.0292093	0.169627	441.581	81.9349	71.4954	30.7551	6.21031	2.39723	8.37996	2.54834	2.90036	4.23541
ChEMBL	negative	5275	3012	416.972	96.901	2.99627	1.70908	2.51242	1.87383	5.05043	2.02462	1.51185	1.15492	0.571185	0.659746	0.138199	0.37461	418.542	95.1989	84.9225	34.7715	5.61555	2.69872	7.69592	2.79744	2.90489	3.98423
ChEMBL	all	10068	4954	427.31	91.4643	3.49516	1.65925	2.91345	1.78582	4.83055	1.93069	1.33313	1.11375	0.650278	0.640138	0.0863131	0.30031	429.51	89.8705	78.5304	33.5966	5.89869	2.5768	8.02956	2.70057	2.9027	4.1077
GOSTAR	positive	3260	1727	432.738	81.3999	4.02256	1.36345	3.3357	1.51776	4.48988	1.61897	1.07485	0.967214	0.726994	0.605452	0.0279141	0.170222	437.672	81.1711	69.1635	28.4676	6.21166	2.45874	8.49512	2.60029	3.12503	4.25743
GOSTAR	negative	3509	1692	417.837	85.4519	2.9544	1.35164	2.33999	1.51168	5.10544	1.71817	1.30607	0.945852	0.679396	0.600731	0.101453	0.313959	424.408	84.1386	81.3714	30.1074	6.03391	2.45315	8.22655	2.65937	2.55444	3.89364
GOSTAR	all	6769	3098	425.013	83.8561	3.46883	1.4585	2.81953	1.59423	4.80898	1.6992	1.19471	0.963154	0.702319	0.603478	0.0660363	0.257688	430.796	82.9878	75.492	29.9567	6.11952	2.45745	8.3568	2.6343	2.83042	4.08362
NCGC	positive	232	173	345.12	87.725	3.74705	1.7032	3.04149	1.81399	3.5431	1.86341	1.23276	1.25847	0.668103	0.585176	0.0862069	0.372988	352.909	93.3426	53.3787	32.6069	5.17241	3.62172	8.78404	2.45365	5.35194	4.19234
NCGC	negative	1234	504	273.136	102.762	1.87161	2.29463	1.36354	2.5046	3.99514	2.47548	1.76985	1.54632	0.409238	0.621296	0.350081	0.663206	280.085	102.661	73.4341	47.3543	4.10859	3.8656	7.77479	3.20179	4.41739	3.89548
NCGC	all	1466	639	284.528	103.909	2.1684	2.3151	1.62908	2.48517	3.9236	2.39478	1.68486	1.51716	0.450205	0.622928	0.308322	0.633662	291.61	104.674	70.2602	45.9282	4.27694	3.84768	7.9526	3.10707	4.58084	3.96494
hERGCentral	positive	4321	2708	399.206	60.0538	3.49115	1.2851	3.02391	1.29849	4.35663	1.4953	0.979403	0.784478	0.639898	0.654976	0.0180514	0.133137	408.878	60.3814	71.5167	30.2084	6.36218	2.3596	7.95548	2.93354	3.80644	3.98764
hERGCentral	negative	274536	73419	354.514	75.4238	2.76169	1.32567	2.58338	1.39609	4.39086	1.6246	1.24434	0.904068	0.208046	0.44505	0.10965	0.330514	355.341	73.7082	86.1686	31.4967	5.20211	2.30208	6.28799	3.31837	2.66639	3.70497
hERGCentral	all	278857	74687	355.206	75.4119	2.77299	1.32811	2.59021	1.3957	4.39033	1.62268	1.24023	0.902929	0.214737	0.452209	0.108231	0.328557	356.17	73.8169	85.9416	31.5291	5.22009	2.30743	6.3186	3.31926	2.6862	3.71305
integrated database ～2000	positive	11	7	471.321	57.3903	5.04618	1.46937	4.672	1.71817	3.36364	0.979121	1.36364	0.481046	0.363636	0.481046	0	0	464.464	43.8578	67.3845	20.9763	6.36364	2.26727	5.90636	2.80669	1.63727	5.69141
integrated database ～2000	negative	5	4	420	57.6244	2.8398	1.71172	3.0116	1.38486	5	0.632456	1	0	0.8	0.4	0.2	0.4	425.128	48.7407	81.246	18.9134	6	1.67332	9.805	2.41699	2.7925	4.60316
integrated database ～2000	all	16	11	455.283	62.1926	4.35669	1.8563	4.15313	1.79477	3.875	1.16592	1.25	0.433013	0.5	0.5	0.0625	0.242061	452.171	48.9615	71.7163	21.3441	6.25	2.10654	6.946	3.21045	1.94533	5.44661
integrated database ～2002	positive	119	80	426.365	88.1272	4.37069	1.63729	3.5782	1.64974	3.36975	1.49995	0.94958	0.720046	0.655462	0.541349	0	0	425.565	87.2219	54.1831	24.7827	5.22689	3.10715	8.20068	2.90861	4.55034	4.81753
integrated database ～2002	negative	20	14	415.743	57.4875	2.32655	1.56981	1.8229	1.78503	5.6	1.28062	1.65	0.90967	0.8	0.4	0.2	0.4	427.1	58.798	93.367	24.9129	5.85	2.05609	10.2989	2.29113	2.82316	3.25553
integrated database ～2002	all	139	91	424.837	84.4887	4.07657	1.77885	3.32564	1.7799	3.69065	1.66577	1.05036	0.789534	0.676259	0.52582	0.028777	0.167179	425.786	83.7303	59.8211	28.3592	5.31655	2.98687	8.49168	2.92244	4.3108	4.67077
integrated database ～2005	positive	301	172	420.419	93.266	4.21476	1.51813	3.45477	1.56471	3.71429	1.5884	1.10963	0.776272	0.737542	0.626825	0.0697674	0.254755	422.674	94.7002	61.6543	27.9701	5.89369	3.11389	8.37435	2.87498	3.29346	5.99115
integrated database ～2005	negative	118	75	397.932	99.8814	2.87435	1.66405	2.41445	1.75296	4.4322	1.79679	1.61017	0.813383	0.745763	0.62689	0.211864	0.428867	402.735	97.9795	81.2262	33.7207	5.73729	3.11755	8.73419	2.24486	3.29655	5.03708
integrated database ～2005	all	419	229	414.086	95.7115	3.83727	1.67302	3.16179	1.68617	3.91647	1.68106	1.2506	0.818473	0.739857	0.626854	0.109785	0.320165	417.059	96.0547	67.1662	30.9795	5.84964	3.11572	8.46905	2.72793	3.29432	5.74168
integrated database ～2007	positive	852	496	438.959	87.4228	4.28711	1.52377	3.55001	1.63028	4.22066	1.65176	1.12207	0.884998	0.753521	0.583658	0.0657277	0.261629	440.117	86.3753	67.7808	29.6476	6.13028	2.61329	8.5469	2.55631	3.18412	4.88432
integrated database ～2007	negative	505	317	405.866	98.6866	2.88911	1.88554	2.36412	1.96692	4.50891	1.82513	1.44554	0.981767	0.631683	0.606064	0.182178	0.425056	411.816	94.9328	78.8458	33.4077	5.63168	2.83594	8.08239	2.49372	3.72656	3.85932
integrated database ～2007	all	1357	749	426.643	93.1598	3.76685	1.79931	3.10869	1.85394	4.32793	1.72396	1.24245	0.935359	0.70818	0.595017	0.109064	0.336721	429.585	90.693	71.8986	31.5566	5.94473	2.70904	8.37669	2.54342	3.38543	4.53863
integrated database ～2010	positive	6971	4061	410.356	72.7307	3.73707	1.36345	3.17821	1.4065	4.30168	1.54456	0.970449	0.831691	0.661885	0.629689	0.025104	0.161849	417.589	71.8448	69.4498	29.9316	6.20571	2.37555	8.1499	2.81882	3.58888	4.13724
integrated database ～2010	negative	276083	74233	354.893	75.6643	2.76448	1.32783	2.58456	1.39829	4.39189	1.62492	1.24478	0.904113	0.209912	0.446693	0.109634	0.330473	355.751	73.989	86.1267	31.4999	5.20575	2.30549	6.29707	3.31605	2.66737	3.7073
integrated database ～2010	all	283054	76551	356.259	76.0806	2.78843	1.33724	2.59919	1.40152	4.38967	1.62305	1.23803	0.9034	0.221043	0.457485	0.107552	0.327627	357.273	74.5556	85.716	31.5682	5.23037	2.31244	6.35157	3.3173	2.69301	3.72302
integrated database ～2012	positive	8442	4804	416.073	76.3774	3.76765	1.36603	3.18183	1.43091	4.36496	1.57278	1.02227	0.894176	0.676854	0.624507	0.0266525	0.168259	422.809	75.7788	70.0132	29.7934	6.26036	2.41736	8.22457	2.76742	3.42347	4.18514
integrated database ～2012	negative	278033	75066	355.156	76.1312	2.7642	1.33245	2.58146	1.40476	4.39547	1.62895	1.24712	0.906732	0.212468	0.449657	0.11039	0.332336	356.031	74.4683	86.1156	31.5344	5.20944	2.31274	6.31073	3.31763	2.6694	3.71128
integrated database ～2012	all	286475	77938	356.951	76.8323	2.79377	1.34421	2.59915	1.4092	4.39457	1.62733	1.24049	0.907161	0.226152	0.462487	0.107922	0.328979	357.999	75.3583	85.641	31.602	5.24041	2.3227	6.37834	3.31862	2.69456	3.73051
integrated database ～2015	positive	9410	5263	418.611	77.2678	3.7898	1.39427	3.19791	1.47072	4.44963	1.67753	1.05845	0.939162	0.688629	0.629397	0.0262487	0.167026	424.822	75.7115	70.9442	30.8289	6.27566	2.41886	8.20077	2.74192	3.3514	4.16052
integrated database ～2015	negative	279425	75803	355.606	76.4492	2.76501	1.33362	2.58075	1.40665	4.40269	1.63485	1.2488	0.908446	0.214659	0.452514	0.110312	0.332239	356.464	74.7685	86.1511	31.5576	5.21259	2.31485	6.31737	3.315	2.66897	3.71102
integrated database ～2015	all	288835	79001	357.658	77.2896	2.7984	1.34798	2.60086	1.41304	4.40422	1.63628	1.2426	0.910091	0.2301	0.466995	0.107574	0.328509	358.691	75.7775	85.6556	31.6495	5.24722	2.32598	6.39112	3.31463	2.69417	3.7308
integrated database	positive	9890	5516	418.7	77.0691	3.79548	1.38884	3.2168	1.46919	4.46582	1.67474	1.07078	0.935993	0.683822	0.633918	0.0266936	0.167945	424.732	75.6949	71.0041	30.6134	6.23883	2.42568	8.18122	2.74059	3.3313	4.14672
integrated database	negative	281329	76420	355.904	76.6131	2.76631	1.33534	2.57927	1.4095	4.408	1.6384	1.24879	0.910222	0.217756	0.455058	0.110252	0.332397	356.794	74.965	86.1129	31.5775	5.21668	2.31782	6.33311	3.31393	2.66566	3.70895
integrated database	all	291219	79806	358.037	77.4681	2.80126	1.35012	2.60092	1.41628	4.40997	1.63968	1.24274	0.911679	0.233584	0.469914	0.107414	0.328515	359.101	75.9929	85.5998	31.6638	5.25139	2.32893	6.40849	3.31273	2.69128	3.72895
